# Supplementary material for: Expression and Misexpression of the miR-183 Family in the Developing Hearing Organ of the Chicken
Source: PubMed Central journal article supplement (PMC4503353; doi:10.1371/journal.pone.0132796), 2015-07-15

|                                             |                                                                                    |
|---------------------------------------------|------------------------------------------------------------------------------------|
| <b>miR-183</b> (gga, dre)<br>(hsa, mmu)     | UAUGGCACUGGGUAGAAUUCACUG<br>UAUGGCACUGGGUAGAAUUCACU                                |
| <b>miR-96</b> (gga, hsa, mmu, dre)          | UUUGGCACUAGCACAUUUUUUGCU                                                           |
| <b>miR-182</b> (gga, hsa)<br>(mmu)<br>(dre) | UUUGGCAAUGGGUAGAACUCACACU<br>UUUGGCAAUGGGUAGAACUCACACCG<br>UUUGGCAAUGGGUAGAACUCACA |

miR-183

Vestibular organs

Cochlear duct

S28

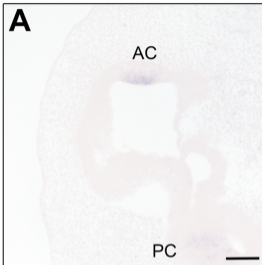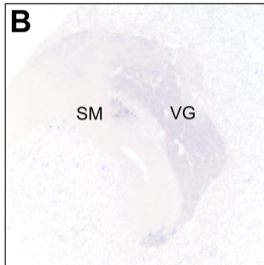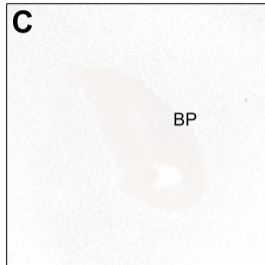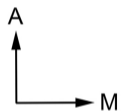

S31

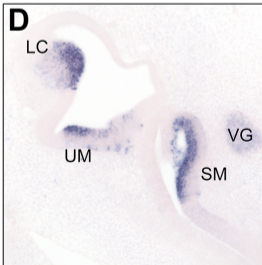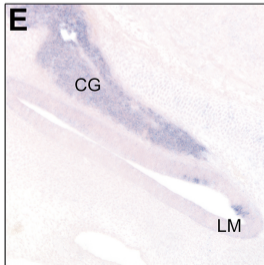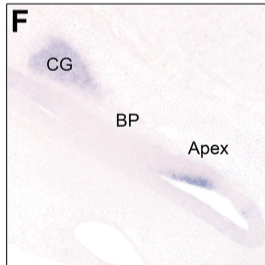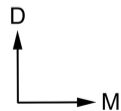

miR-96

Vestibular organs

Cochlear duct

S28

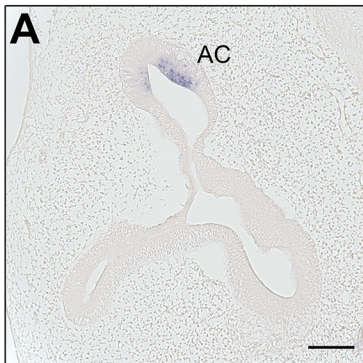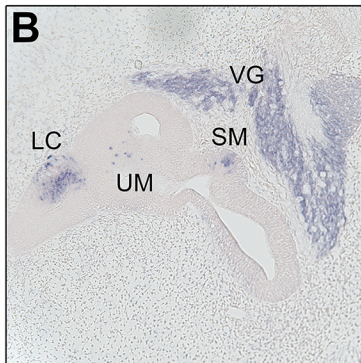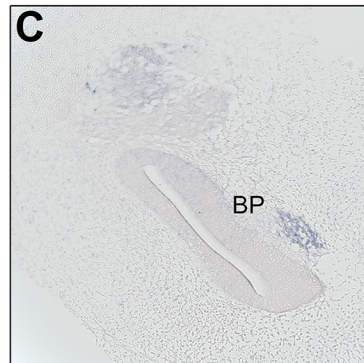

S32

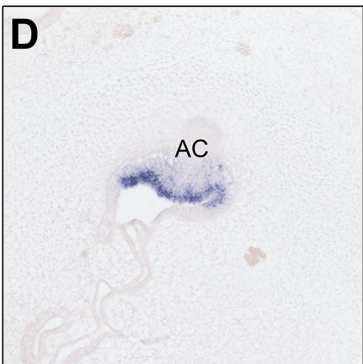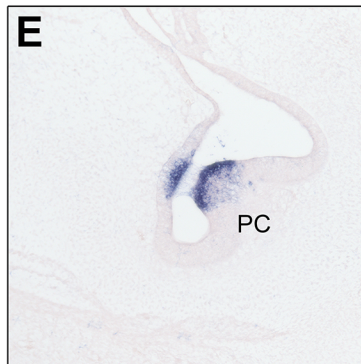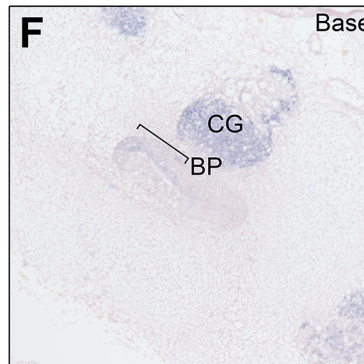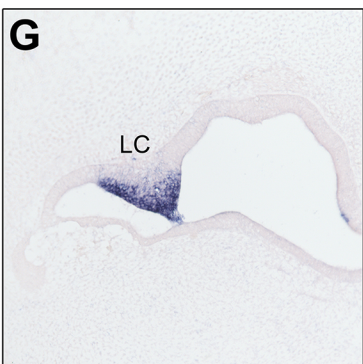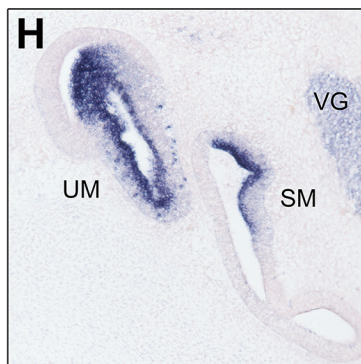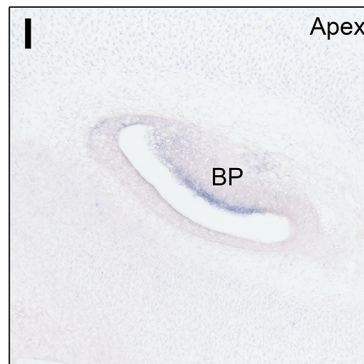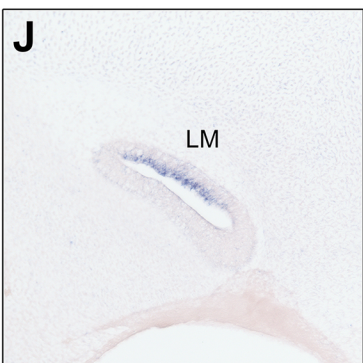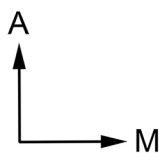



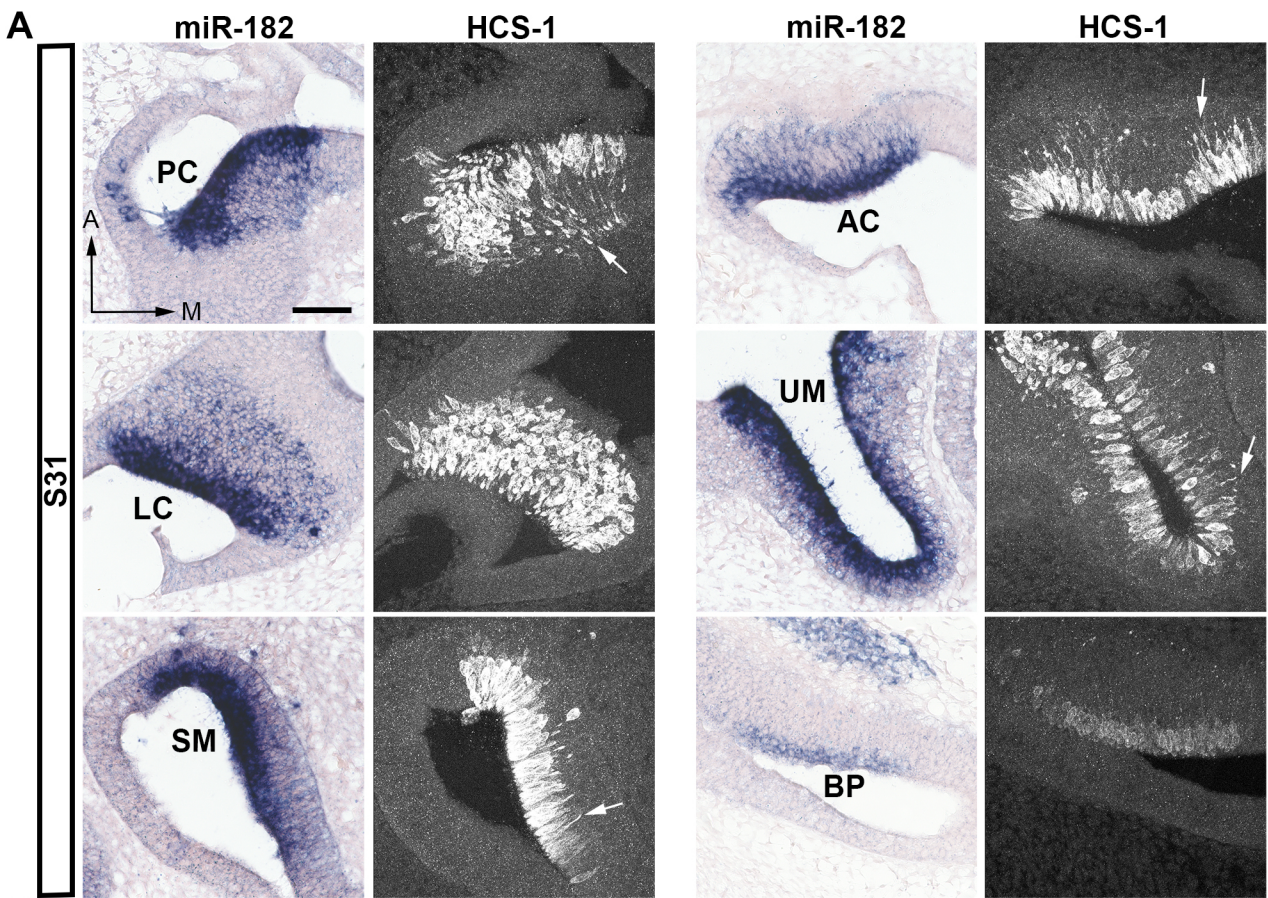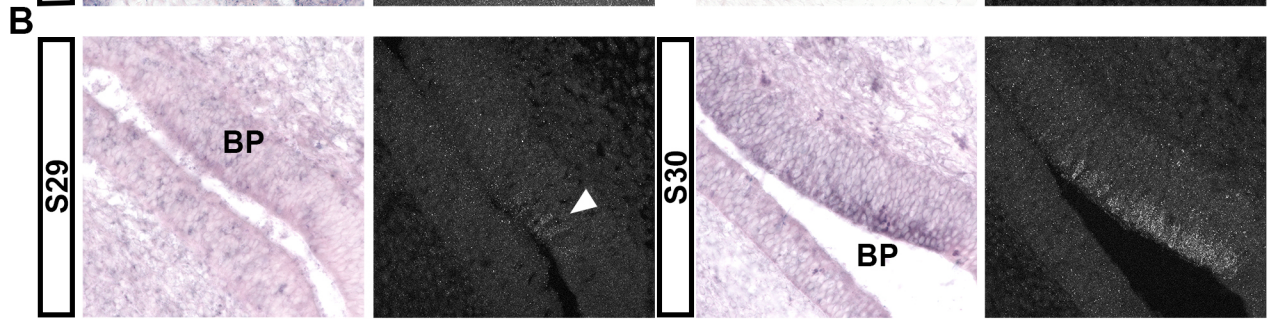



# miR-182

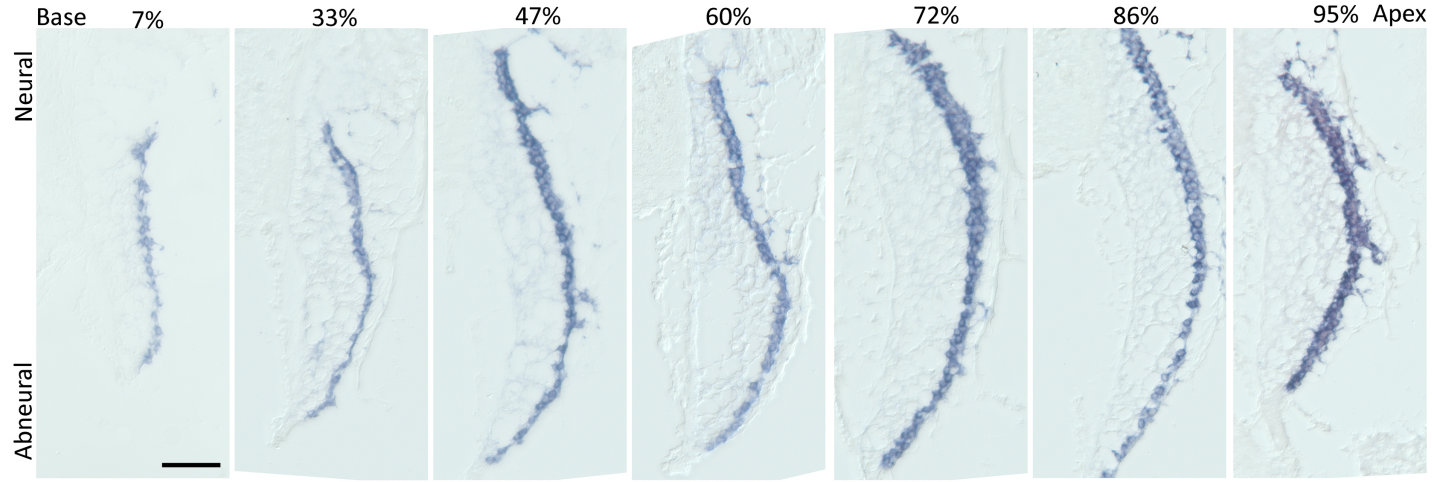

**Ctrl****pGFP-183F**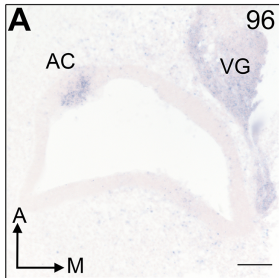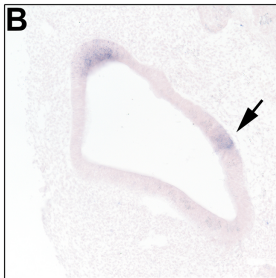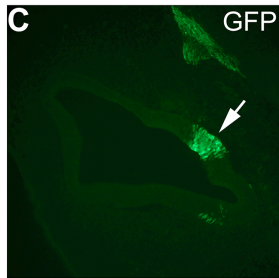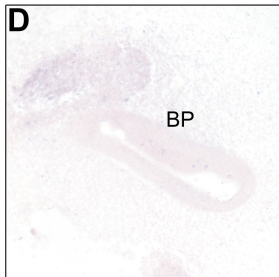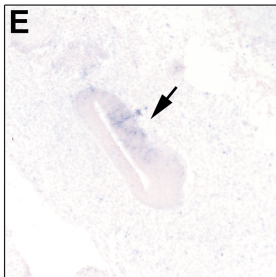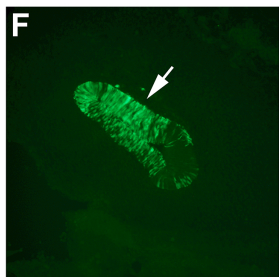

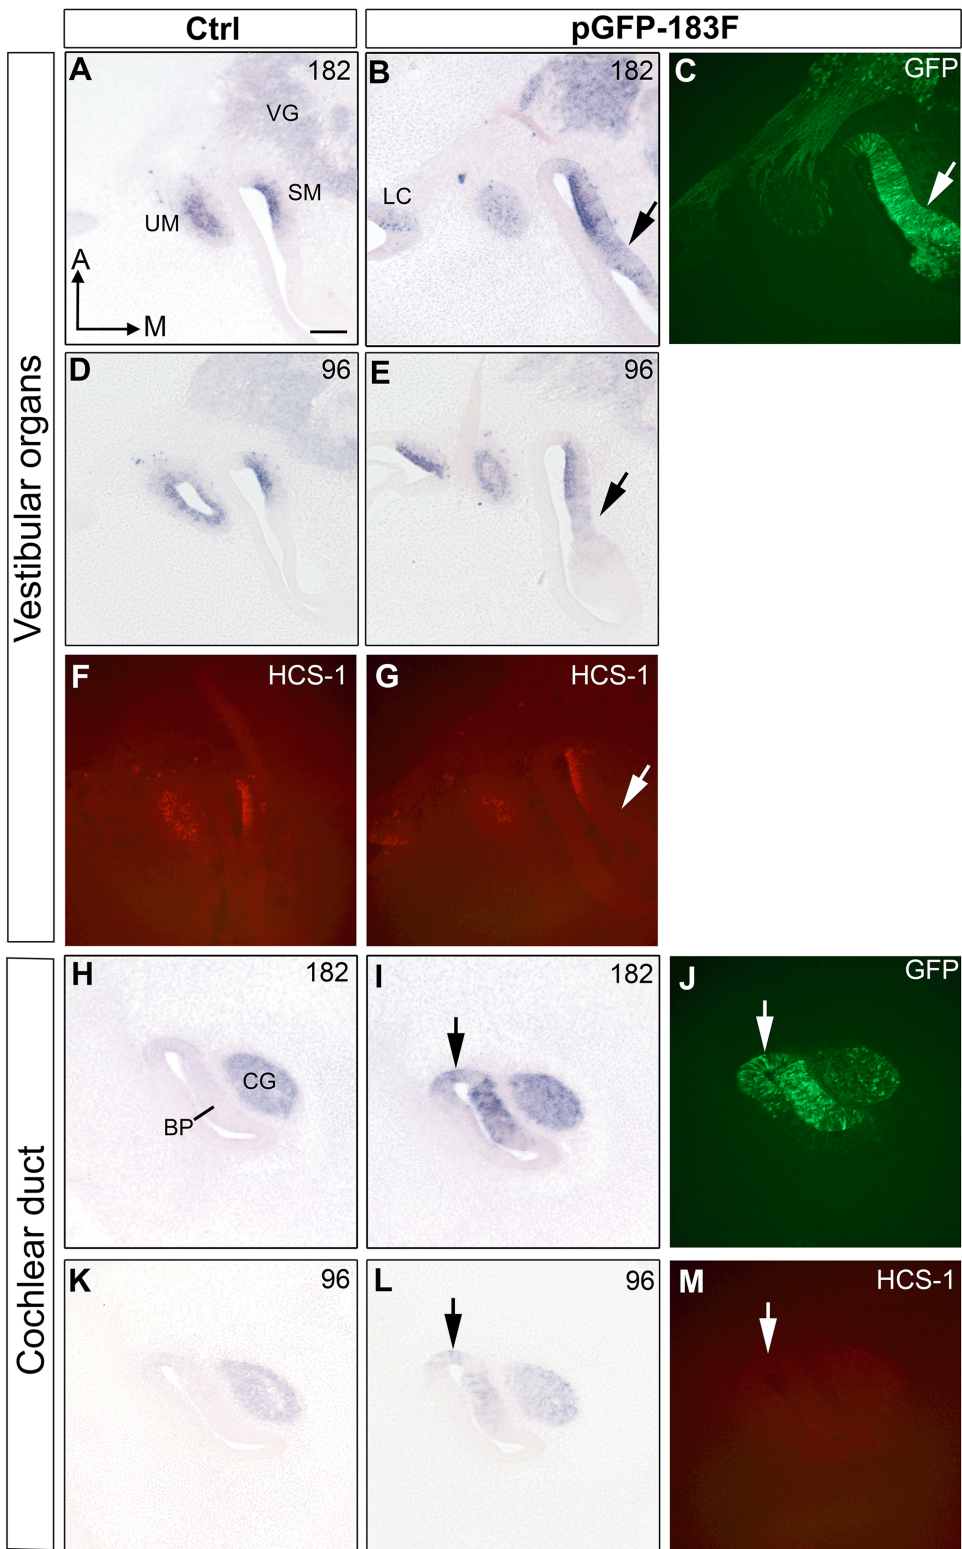

Supplement: pone.0132796.s008.pdf [file pone.0132796.s008.pdf]
