# Supplementary material for: Expression and Misexpression of the miR-183 Family in the Developing Hearing Organ of the Chicken
Source: PubMed Central journal article supplement (PMC4503353; doi:10.1371/journal.pone.0132796), 2015-07-15
Supplement: pone.0132796.s009.pdf [file pone.0132796.s009.pdf]

February 23, 2015

PLOS ONE Journal

To Whom It May Concern:

This letter is to certify that Prof. Donna Fekete did not need approval from Purdue's Institutional Animal Care and Use Committee (IACUC) for her work with chicken embryos. Prof. Fekete used embryos up to 18 days developed that were immediately euthanized by decapitation. Purdue's IACUC does not require an approved protocol for chickens until day 21 when they hatch into a live animal.

Please feel free to contact this office should you need further information or assistance.

Sincerely,



Lisa D. Snider  
IACUC Administrator
